# Supplementary material for: Spatial spin-up of precipitation in limited-area convection-permitting simulations over North America
Source: Copernicus journal article supplement (doi:10.5194/egusphere-2023-1512), 2023-10-04

Old figure

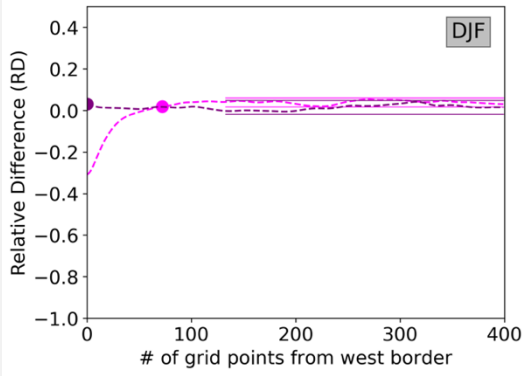

New figure

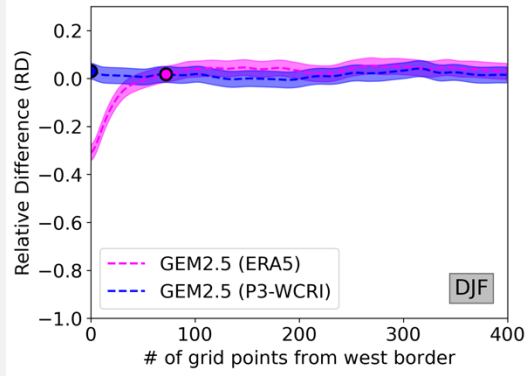

Supplement: Supplementary file [file egusphere-2023-1512-AC4-supplement.pdf]
